# Supplementary material for: Effect of Insertion and Deletion in the Meq Protein Encoded by Highly Oncogenic Marek’s Disease Virus on Transactivation Activity and Virulence
Source: MDPI journal article supplement (doi:10.3390/v14020382), 2022-02-14
Supplement: s1 [file s1]

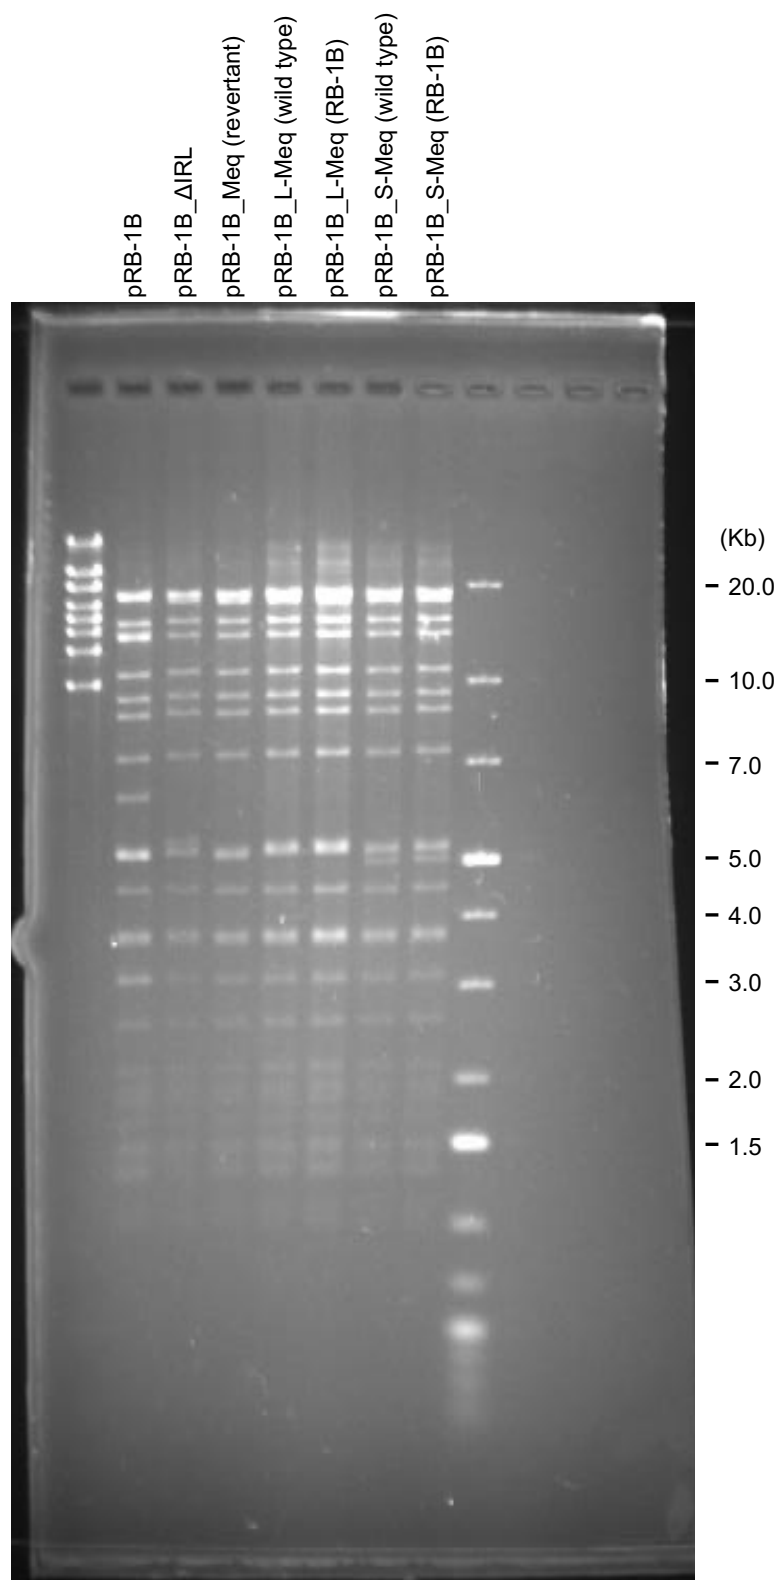

**Supplementary Figure S1.** The original uncropped image related to Figure 2B.

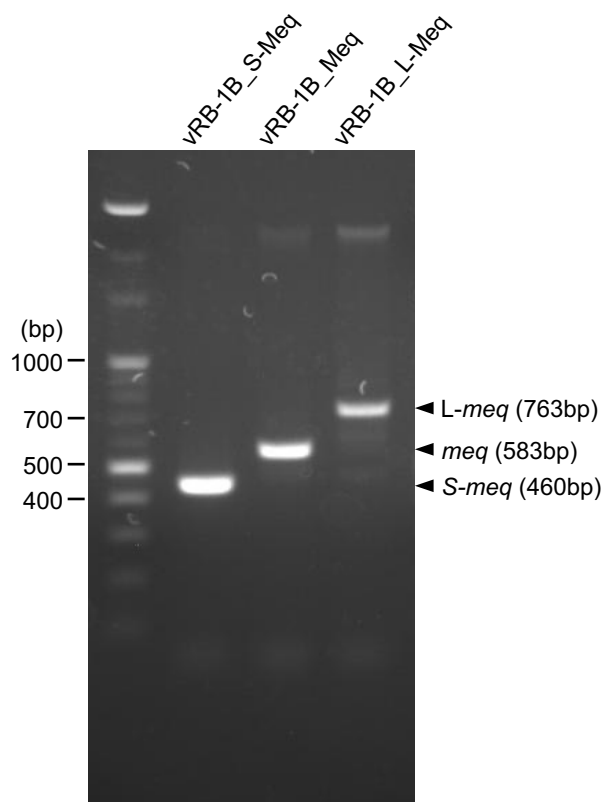

**Supplementary Figure S2.** The original uncropped image related to Figure 3A.
